# Supplementary material for: RNA sequencing revealed the multi-stage transcriptome transformations during the development of gallbladder cancer associated with chronic inflammation
Source: PubMed Central journal article supplement (PMC10062614; doi:10.1371/journal.pone.0283770), 2023-03-30

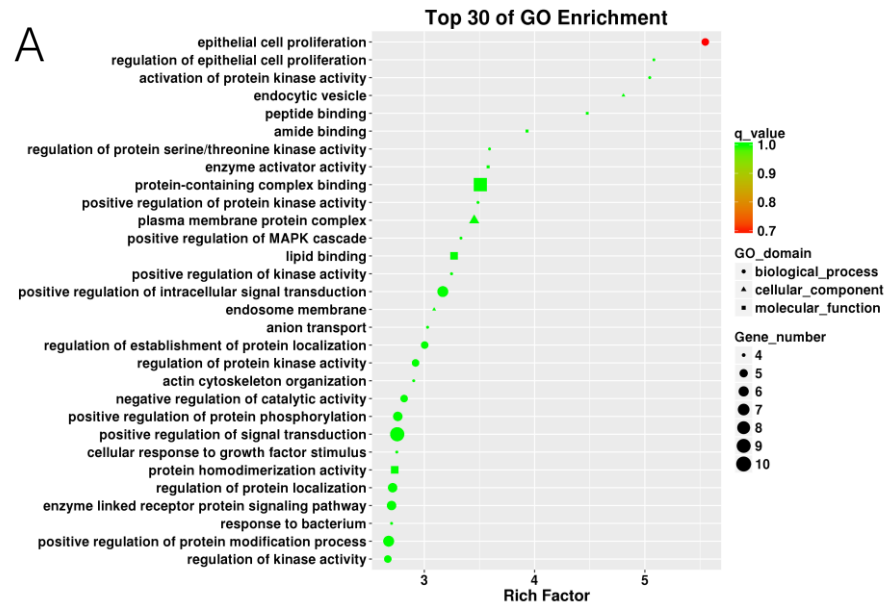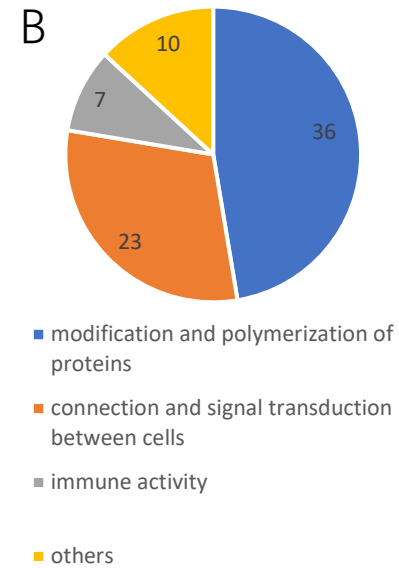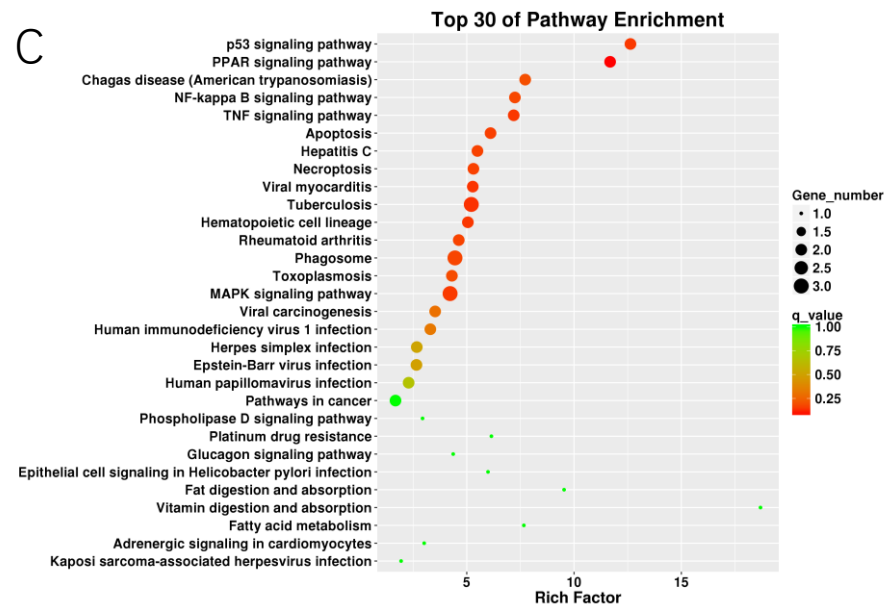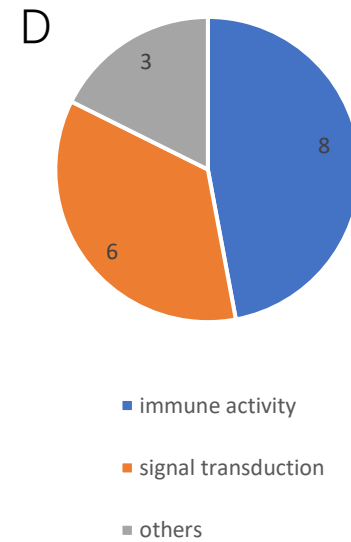

Supplement: pone.0283770.s004.pdf [file pone.0283770.s004.pdf]
